# Supplementary material for: Content Validity of A Questionnaire Exploring the Knowledge Translation Network Among Nursing Professionals
Source: Research Square preprint supplement (doi:10.21203/rs.3.rs-144672/v1), 2021-01-15
Supplement: Supplementary file 2 [file 5b478daaa839dc5b0ac9b208.docx]

**Appendix A: Content Evaluation Template**

Network analysis: transferring evidence into a clinical practice template for calculating the content validation index.

Dear:

To carry out the content validation phase of the network questionnaire by the expert group, it is necessary to know the Content Validity Index.

To do so, you must fill in the template that I have attached, giving each item a rating of between 1 and 4 points according to the relevance you attribute to each of the questions and their components (sub-questions) in relation to the questionnaire as a whole.

The left-hand column contains all the questions in the questionnaire, and the right-hand column has a space for you to record your ratings between 1 and 4, in accordance with the following scale:

1= Irrelevant

2= In some ways relevant

3= Quite relevant

4= Extremely relevant

Please also indicate these data which are requested in all countries from the expert group:

Evaluator No._____ (do not fill) Country:

Age ____

Gender: Male 0 Female 0

Academic level ___________________

THANK YOU VERY MUCH FOR YOUR COLLABORATION

| **TRANSFER OF EVIDENCE INTO CLINICAL PRACTICE: NETWORK ANALYSIS** | | | | | | | | | | |
| --- | --- | --- | --- | --- | --- | --- | --- | --- | --- | --- |
| Taking into account the definition of the direct use of research:  Direct use of research is: use of research results when they are used directly in providing care or interventions to patients. It is not research that you have learned in your studies/faculty. Direct use often results in the development of protocols.  Example of the Direct Use of Drilldown Reporting:  Administer standardized analgesia during the first 24 hours of the postoperative period even if the patient does not request it that often (the evidence recommends this practice). | | | | | | | | | | |
| When you need information/advice on research results for direct use in your clinical practice, which of the following sources have you turned to **in the last year** for information? | | | | | | | | | | |
| Never | | Rarely | | | Sometimes | | Often | | Always | SCORE |
| 1 | | 2 | | | 3 | | 4 | | 5 |
| Clinical Practice Guidelines/Protocols | | | | | | | | | |  |
| Databases/Scientific Articles | | | | | | | | | |  |
| Internet/Social Networks/Webs (specify which) | | | | | | | | | |  |
| Books | | | | | | | | | |  |
| Sessions/Courses/Congresses | | | | | | | | | |  |
| My colleagues | | | | | | | | | |  |
| How often have you used the following professional groups **in the last year** to obtain information/advice on research results? | | | | | | | | | | |
| Never | Rarely | | | Sometimes | | Often | | | Always | SCORE |
| 1 | 2 | | | 3 | | 4 | | | 5 |
| Doctors in my unit | | | | | | | | | |  |
| Physicians from another unit (specify unit) | | | | | | | | | |  |
| Nurses in my unit | | | | | | | | | |  |
| Nurses from another unit (specify unit) | | | | | | | | | |  |
| TCAE of my unit | | | | | | | | | |  |
| TCAE from another unit (specify unit) | | | | | | | | | |  |
| Residents of my unit | | | | | | | | | |  |
| Residents of another unit (specify unit) | | | | | | | | | |  |
| Other health professionals outside my facility (specify unit and professional category) | | | | | | | | | |  |
| When you need to obtain information or advice relevant to your clinical practice, **from the following list**: Who have you asked**, in the last year**, for information/advice on topics related to research results to apply them to your clinical practice?    **Example:** You need information on research results for choosing an antiseptic to carry out a central line cure  **Explanation:** This question will display a list of the respondent's unit components (list with first and last names) | | | | | | | | | | |
| Never | Rarely | | | Sometimes | | Often | | | Always | SCORE |
| 1 | 2 | | | 3 | | 4 | | | 5 |
| Name and Surname | | | | | | | | | |  |
| **From the** **following list**, with whom have you worked/collaborated, **during the last year**, in projects related to the improvement of clinical practice?  **Example:** Work/collaborate on an evidence update project on routine nursing procedures in your unit.  **Explanation**: This question will display a list of the respondent's unit components (list with first and last names) | | | | | | | | | | |
| Never | Rarely | | | Sometimes | | Often | | | Always | SCORE |
| 1 | 2 | | | 3 | | 4 | | | 5 |
| Name and Surname | | | | | | | | | |  |
| **From the following list,** to whom have you given, **in the last year**, advice or information on topics related to research results to apply them to clinical practice?  **Explanation**: This question will display a list of the respondent's unit components (list with first and last names) | | | | | | | | | | |
| Never | Rarely | | | Sometimes | | Often | | | Always | SCORE |
| 1 | 2 | | | 3 | | 4 | | | 5 |
| Name and Surname | | | | | | | | | |  |
| To whom have you given, **in the last year**, advice or information on topics related to research results to apply them to clinical practice outside your unit (but within your hospital)? | | | | | | | | | | |
| Name Surname | | | Professional Category | | | | | Unity | | SCORE |
|  | | |  | | | | |  | |  |
| **During the last year,** where have you usually shared information related to the results of research? (Please check at least three and the order of election 1 to 3) | | | | | | | | | | SCORE |
| Living/nursing office | | | | | | | | | |  |
| Within the work unit | | | | | | | | | |  |
| Library | | | | | | | | | |  |
| Hospital cafeteria | | | | | | | | | |  |
| Scientific events | | | | | | | | | |  |
| Other places outside the hospital (specify which) | | | | | | | | | |  |
| Indicate the degree to which the following organizational factors have been present in your workplace **over the past year.** | | | | | | | | | | |
| Never | Rarely | | | Sometimes | | Often | | | Always | SCORE |
| 1 | 2 | | | 3 | | 4 | | | 5 |
| Nurses with research skills | | | | | | | | | |  |
| Time to participate in research activities | | | | | | | | | |  |
| Encourage attendance at clinical and research conferences | | | | | | | | | |  |
| Group or commission that evaluates the research | | | | | | | | | |  |
| External or internal funding for research | | | | | | | | | |  |

**Appendix B**

**Network Questionnaire**

Bearing in mind the definition of the DIRECT use of research:

The use of research results when they are used in a direct manner to provide care or carry out surgery on the patients. (Anything you may have learnt during your studies or at the faculty does not count as research). Direct use usually takes place once the protocols are established.

An example of the direct use of research: Administer scheduled analgesia during the first twenty-four hours of post-operative care, even though the patient has not requested it at this frequency (evidence recommends this practice).

1. When you need to obtain information/advice on the results of research to be able to use them directly in your clinical practice, which of the following sources have you consulted during the last year to obtain information? Use of research

Never-Rarely-Sometimes-Frequently-Always

- Clinical Practice Guides/Protocols
- Databases/Scientific articles
- Internet/Social Networks/Webs (Specify which)
- Books
- Sessions/Courses/Congresses
- My colleagues

1. In the previous year, how often have you resorted to the following professional groups to obtain information/advice on the results of the research? Knowledge translation

Never-Rarely-Sometimes-Frequently-Always

For example: You need information on the results of research for the choice of an antiseptic to carry out treatment in a central line.

- Doctors from my unit
- Doctors from another unit (specify unit)
- Nurses from my unit
- Nurses from another unit (specify unit)
- TCAE from my unit
- TCAE from another unit (specify unit)
- Residents in my unit
- Residents from another unit (specify unit)
- Other professionals/health workers not from my unit (specify center and unit)

1. When you need to obtain information or advice relevant to your clinical practice, from the following list: who have you asked, in the last year, information/advice on subjects related to the results of research in order to apply them to your clinical practice? Knowledge translation

Never-Rarely-Sometimes-Frequently-Always

For example: you need information on the results of research around the choice of an antiseptic to carry out treatment in the central line.

Name, Family names.

1. From the following list, with whom have you worked/collaborated, in the last year, on projects related to improving clinical practice? Knowledge translation

Never-Rarely-Sometimes-Frequently-Always

For example: work/collaboration on a project for updating evidence on common nursing procedures in your unit.

Name, Family names

1. From the following list, in the last year, who has given you advice or information on issues related to the results of research in order to apply them to clinical practice? Research utilization

Never-Rarely-Sometimes-Frequently-Always

Name, Family names

1. In the past year, who has given you advice or information on issues related to the results of research in order to apply them to clinical practice outside of your unit (but in your hospital)? Research utilization

Name, Family name. The category of the unit

1. In the last year, in which place/environment have you usually shared information related to the results of research? (Highlight at least three, and in order of choice, 1st to 3rd). Research utilization

- In the nursing office
- In the work unit
- Library
- Hospital cafeteria
- Scientific events
- Other places outside of the hospital (specify which)

1. Indicate the degree to which the following organizational factors have been present in your workplace in the past year.

Never-Rarely-Sometimes-Frequently-Always

- Nurses with knowledge of research
- Time to participate in research activities
- Encourage attendance at conferences into clinical research
- Group or commission who evaluates research
- External or internal financing for research

1. Sociodemographic/Professional and Training Characteristics

• Sex: Man/Woman

• Age:

• Years of professional experience

o From 0 to 5

o From 6 to 10

o From 11 to 20

o From 21 to 30

o More than 30

• Years of experience in the unit in which you are currently working

o From 0 to 5

o From 6 to 10

o From 11 to 20

o From 21 to 30

o More than 30

• Unit in which you work

o Reanimation

o Intensive Care Unit

o Accident and Emergencies

o Orthopedics

o Surgery

o Hospitalization at home

o Antenatal Department

o Cardiology/Urology/Ear, Nose and Throat

o Gynaecology

o Others (specify unit)

• Post that you occupy

o Welfare

o Manager (provision, management, head of service)

• Hours of training in research in the last three years

o No training

o Less than 40 hours

o Between 40 and150 hours

o More than 150 hours

• Qualification (multichoice)

o Technician

o Qualified

o Graduate

o Specialty

o Master’s Degree

o Welfare
